# 1           **Inbreeding is associated with shorter early-life** 2                           **telomere length in a wild passerine**

3 Michael Le Pepke<sup>1\*</sup>, Alina K. Niskanen<sup>1,2</sup>, Thomas Kvalnes<sup>1</sup>, Winnie Boner<sup>3</sup>, Bernt-Erik  
4 Sæther<sup>1</sup>, Thor Harald Ringsby<sup>1§</sup> & Henrik Jensen<sup>1§</sup>

5 <sup>1</sup>Centre for Biodiversity Dynamics (CBD), Department of Biology, Norwegian University of  
6 Science and Technology (NTNU), Trondheim, Norway.

7 <sup>2</sup>Ecology and Genetics Research Unit, University of Oulu, Oulu, Finland.

8 <sup>3</sup>Institute of Biodiversity, Animal Health and Comparative Medicine (IBAHCM), University  
9 of Glasgow, UK.

10 \*Correspondence: Michael Le Pepke, email: michael@pepke.dk.

11 §Joint senior authors.

12 **Key words:** biomarker, conservation physiology, heterosis, inbreeding depression, SNP,  
13 telomere dynamics

14 **Word count:** 4,463 (main text); 173 (abstract); 136 references; 1 figure and 5 tables.

15

## 16 **ACKNOWLEDGEMENTS**

17 We thank everyone contributing to the fieldwork, Randi Røsbak, Anna S. Båtnes, and Linn-  
18 Karina Selvik for performing DNA extractions for genotyping procedures, and Pat Monaghan  
19 for facilitating telomere analyses at the University of Glasgow and for commenting on an  
20 early version of this manuscript.

21 **ABSTRACT**

22 Inbreeding can have negative effects on survival and reproduction, which may be of  
23 conservation concern in small and isolated populations. However, the physiological  
24 mechanisms underlying inbreeding depression are not well-known. The length of telomeres,  
25 the DNA sequences protecting chromosome ends, has been associated with health or fitness  
26 in several species. We investigated effects of inbreeding on early-life telomere length in two  
27 small island populations of wild house sparrows (*Passer domesticus*) known to be affected by  
28 inbreeding depression. Using genomic and pedigree-based measures of inbreeding we found  
29 that inbred nestling house sparrows have shorter telomeres. This negative effect of inbreeding  
30 on telomere length may have been complemented by a heterosis effect resulting in longer  
31 telomeres in individuals that were less inbred than the population average. Furthermore, we  
32 found some evidence of stronger effects of inbreeding on telomere length in males than  
33 females. Thus, telomere length may reveal subtle costs of inbreeding in the wild and  
34 demonstrate a route by which inbreeding negatively impacts the physiological state of an  
35 organism already at early life-history stages.

36

37 **INTRODUCTION**

38 Inbreeding may have significant detrimental effects on survival, reproduction, and  
39 resistance to disease and other stressors in wild populations (Keller & Waller, 2002). Such  
40 decline in fitness resulting from an increase in genome-wide homozygosity is known as  
41 inbreeding depression (Charlesworth & Willis, 2009) and is of major concern in small and  
42 isolated populations, in particular of endangered species (Bozzuto, Biebach, Muff, Ives, &  
43 Keller, 2019; Harrisson et al., 2019; Hedrick & Kalinowski, 2000). Increased homozygosity  
44 can lead to reduced fitness due to expression of deleterious recessive alleles (“dominance  
45 hypothesis”) or increased homozygosity at loci with heterozygote advantage

46 (“overdominance hypothesis”, Charlesworth & Willis, 2009). Regardless of the genetic basis  
47 for inbreeding depression, it is difficult to identify and quantify the physiological  
48 mechanisms underlying the fitness costs of inbreeding (Fox & Reed, 2011; Kristensen,  
49 Pedersen, Vermeulen, & Loeschcke, 2010; Losdat, Arcese, Sampson, Villar, & Reid, 2016).

50       Telomeres are short DNA tandem repeats that are found at the tips of most eukaryotic  
51 chromosomes (Blackburn & Gall, 1978; Červenák, Sepšiová, Nosek, & Tomáška, 2021).  
52 Telomeres shorten during cell division (Harley, Futcher, & Greider, 1990), but may also  
53 shorten due to several other reasons including physiological processes generating oxidative  
54 stress (Barnes, Fouquerel, & Opresko, 2019; Monaghan & Ozanne, 2018; Reichert & Stier,  
55 2017; von Zglinicki, 2002). The high guanine content of telomeres (50%) makes them  
56 particularly vulnerable to oxidative stress (Kawanishi & Oikawa, 2004). Short telomeres can  
57 trigger apoptosis and telomere attrition is considered a hallmark of aging (López-Otín,  
58 Blasco, Partridge, Serrano, & Kroemer, 2013), although the causal involvement of telomere  
59 shortening in organismal senescence is not well understood (Simons, 2015). However,  
60 telomere length (TL) may reflect the cumulative stress experienced by an individual  
61 (Bateson, 2016; Monaghan, 2014), and TL or TL shortening are associated with health or  
62 fitness in several species (Barrett, Burke, Hammers, Komdeur, & Richardson, 2013;  
63 Chatelain, Drobniak, & Szulkin, 2020; Froy et al., 2021; Heidinger, Kucera, Kittilson, &  
64 Westneat, 2021; Wilbourn et al., 2018). Thus, TL is increasingly used as a biomarker of  
65 somatic integrity in studies of physiological or evolutionary ecology (Bateson & Poirier,  
66 2019; Haussmann, 2010; Pepper, Bateson, & Nettle, 2018; Young, 2018).

67       Inbreeding depression can be caused by reduced immune response (Charpentier,  
68 Williams, & Drea, 2008; Reid, Arcese, & Keller, 2003) and higher maintenance metabolism  
69 (Ketola & Kotiaho, 2009), which increases oxidative stress (de Boer et al., 2018a; Okada,  
70 Blount, Sharma, Snook, & Hosken, 2011). Thus, inbred individuals may experience higher

71 levels of oxidative stress (Kristensen, Sørensen, Kruhøffer, Pedersen, & Loeschcke, 2005;  
72 Pedersen et al., 2008) and thus have shorter telomeres (von Zglinicki, 2002). We therefore  
73 hypothesize that TL could provide an integrative measure of the somatic costs associated  
74 with inbreeding depression in wild populations, with inbred individuals having shorter  
75 telomeres than outbred individuals. However, the few studies investigating associations  
76 between inbreeding and TL have found equivocal results. In line with our expectations,  
77 Bebbington et al. (2016) found that homozygosity was negatively associated with TL in wild  
78 Seychelles warblers (*Acrocephalus sechellensis*) and Seluanov et al. (2008) reported that  
79 telomeres were shorter in inbred laboratory strains of Norway rats (*Rattus norvegicus*) in  
80 captivity compared to a single wild-caught rat. Many domesticated species are generally  
81 assumed to be more inbred than their wild counterparts (Bosse, Megens, Derks, de Cara, &  
82 Groenen, 2018; Moyers, Morrell, & McKay, 2018; Wiener & Wilkinson, 2011). However,  
83 several studies have found that telomeres were longer in inbred domesticated strains of  
84 laboratory mice (*Mus* spp. and *Peromyscus* spp., Hemann & Greider, 2000; Manning,  
85 Crossland, Dewey, & Van Zant, 2002; Seluanov et al., 2008), in domesticated strains of pearl  
86 millet (*Pennisetum glaucum*, Sridevi, Uma, Sivaramakrishnan, & Isola, 2002), in  
87 domesticated inbred chicken (*Gallus gallus*, O'Hare & Delany, 2009), and across several  
88 species of domesticated mammals (Pepke & Eisenberg, 2021) compared to non-domesticated  
89 species. However, there were no clear differences in TL between inbred and wild leporid  
90 strains (Forsyth, Elder, Shay, & Wright, 2005). Other studies found no association between  
91 pedigree-based inbreeding coefficients and TL or telomere attrition in humans (*Homo*  
92 *sapiens*, Mansour et al., 2011), wild sand lizards (*Lacerta agilis*, Olsson, Wapstra, & Friesen,  
93 2018), or wild natterjack toads (*Epidalea calamita*, Sánchez-Montes et al., 2020). Becker et  
94 al. (2015) reported a weak non-significant but positive association between inbreeding and  
95 TL in wild white-throated dippers (*Cinclus cinclus*).

96           These contrasting results suggest that the telomere dynamics of captive, domesticated  
97 species living in a controlled environment may not be representative of wild, free-living  
98 populations (Chatelain et al., 2020; Pepke & Eisenberg, 2021; Weinstein & Cizek, 2002).  
99 For instance, captive populations may be less vulnerable to inbreeding because inbreeding  
100 depression is greater under stressful environmental conditions (Fox & Reed, 2011; Reed,  
101 Briscoe, & Frankham, 2002). Furthermore, captivity may in itself provide conditions that  
102 change the telomere dynamics of the populations (Eisenberg, 2011), e.g. Hemann and Greider  
103 (2000) attributed the longer telomeres of inbred mice to effects of captive breeding and not  
104 inbreeding *per se*. For instance, TL shortening rates may increase during metabolically costly  
105 processes such as reproduction (Sudyka, Arct, Drobniak, Gustafsson, & Cichoń, 2019; Wood  
106 et al., 2021) and inbreeding may reduce fecundity (Keller & Waller, 2002). Such effects have  
107 been suggested to explain the observation of longer adult TL in some inbred domesticated  
108 species (Eisenberg, 2011), which could be resolved by measuring TL in early-life.  
109 Furthermore, most of the studies of domesticated animals compared TLs of different  
110 populations or species and their results may not be extrapolated to natural variation in TL and  
111 inbreeding levels within wild populations. Indeed, TL can vary considerably within species  
112 (Tricola et al., 2018) and across closely related species (Pepke, Ringsby, & Eisenberg, 2021)  
113 in the wild. Finally, it is not known if outbreeding could be accompanied by a heterosis effect  
114 (hybrid vigor, e.g. Charlesworth & Willis, 2009) acting on TL. For instance, the observed  
115 fitness benefits of outcrossing inbred populations (Frankham, 2015) could be reflected in TL  
116 restoration (Nuzhdin & Reiwitch, 2002; Ozawa et al., 2019).

117           In this study, we utilized a long-term metapopulation study to examine how  
118 inbreeding affects early-life TL in wild house sparrows (*Passer domesticus*). Inbreeding has  
119 been shown to reduce fitness components such as recruitment probability, adult lifespan, and  
120 both annual and lifetime reproductive success in this metapopulation (Billing et al., 2012;

121 Jensen, Bremset, Ringsby, & Sæther, 2007; Niskanen et al., 2020), but the physiological  
122 effects underlying these phenomena remain unknown. We expect that inbred individuals will  
123 have shorter telomeres if TL is a general biomarker of somatic integrity and health (e.g.  
124 Bebbington et al., 2016; Boonekamp, Simons, Hemerik, & Verhulst, 2013; Wilbourn et al.,  
125 2018). The effects of inbreeding on TL might be sex-specific (Benton et al., 2018; Billing et  
126 al., 2012; de Boer et al., 2018a; de Boer, Eens, & Müller, 2018b) or depend on environmental  
127 conditions (Armbruster & Reed, 2005; Szulkin & Sheldon, 2007). However, TL is negatively  
128 associated with body size or growth rate within many species (Monaghan & Ozanne, 2018;  
129 Ringsby et al., 2015) and may change with age (Hall et al., 2004; Remot et al., 2021) or vary  
130 between sexes (Barrett & Richardson, 2011; Remot et al., 2020) and habitat quality  
131 (Angelier, Vleck, Holberton, & Marra, 2013; McLennan et al., 2021; Wilbourn et al., 2017).  
132 We therefore account for body size (measured as tarsus length), age, sex, and habitat type,  
133 and test for an interaction between inbreeding levels and sex or habitat type, when  
134 investigating the association between TL and inbreeding. We use three different measures of  
135 inbreeding; marker-based estimates ( $n=371$ ) which are better at capturing homozygosity and  
136 inbreeding caused by distant ancestors not included in a pedigree, and pedigree-based  
137 estimates (Kardos, Taylor, Ellegren, Luikart, & Allendorf, 2016) for which larger samples  
138 size may be obtained from long-term field studies ( $n=1195$ ). Finally, to investigate a potential  
139 heterosis effect on TL, we test if the association between TL and inbreeding is different  
140 among outbred and inbred individuals.

141

## 142 **MATERIAL AND METHODS**

### 143 *Study system*

144 This study was conducted in two natural populations of house sparrows in northern  
145 Norway. On the island of Hestmannøy (66°33'N, 12°50'E), the sparrows live around dairy

146 farms, where they nest inside barns in cavities or nest boxes. The island is characterized by  
147 cultivated grassland, mountains, forest, and heathland. On the island of Træna (66°30'N,  
148 12°05'E), 34 km further from the mainland, the sparrows live in gardens of a small human  
149 settlement and nest in nest boxes. This island is dominated by heathland, sparse forest, and  
150 gardens. The natural breeding environment for house sparrows is human habitation (Hanson,  
151 Mathews, Hauber, & Martin, 2020) and they have evolved their commensal relationship with  
152 humans for millennia (Ravinet et al., 2018). While human presence or farming provide the  
153 natural basis of existence for house sparrows (Ringsby, Sæther, Jensen, & Engen, 2006),  
154 demographic characteristics, breeding densities, and inbreeding rates are comparable to other  
155 small isolated wild animal populations (Araya-Ajoy et al., 2021; Jensen et al., 2007;  
156 Niskanen et al., 2020). In the years 1994-2013 (on Hestmannøy) and 2004-2013 (on Træna),  
157 nestlings at the age of 5-14 days were ringed with a unique combination of color rings for  
158 identification. Nestlings were also blood sampled by brachial venipuncture, and  
159 tarsometatarsus (tarsus) was measured with slide calipers to the nearest 0.01 mm. Tarsus  
160 length is here used as an index of body size (Rising & Somers, 1989; Senar & Pascual, 1997).  
161 Blood samples (25 µL) were stored in 96% ethanol at room temperature in the field and at -  
162 20°C in the laboratory until DNA extraction (described in Pepke et al., *submitted 2021b*).  
163 Birds that were resighted or recaptured in the year following hatching (i.e. from 1995-2014  
164 on Hestmannøy and from 2005-2014 on Træna) were categorized as first-year survivors.

#### 165 *Telomere length measurements*

166 Relative erythrocyte telomere length (TL) was measured in DNA derived from whole  
167 blood samples ( $n=2746$  nestlings) using the qPCR method (Cawthon, 2002) as described in  
168 Pepke et al. (*submitted 2021a*). For this study, we included only individuals with two known  
169 parents and at least two known grandparents, or for which genomic inbreeding coefficients  
170 could be estimated (described below), resulting in a sample size of  $n=1370$  individuals

171 ( $n=1161$  from Hestmannøy and  $n=209$  from Træna). TL was determined relative to the  
172 amount of a non-variable gene (GAPDH) and a reference sample (Criscuolo et al., 2009). All  
173 samples were randomized and run in triplicates on 96-well plates. All samples were  
174 processed within a few months by the same researcher (MLP) to reduce technical effects.  
175 Relative TL was computed using qBASE (Hellemans, Mortier, De Paepe, Speleman, &  
176 Vandesompele, 2007) while controlling for inter-run variation. All individual plate  
177 efficiencies were within  $100\pm 10\%$  (see Pepke et al., *submitted* 2021a). Sex was determined  
178 by amplification of the CHD-gene as described in Jensen et al. (2007).

#### 179 *Microsatellite pedigree construction*

180 Microsatellite (MS) pedigrees ( $n=1857$  individuals from Hestmannøy and  $n=342$  from  
181 Træna including non-phenotyped ancestors) were constructed based on 13 polymorphic  
182 microsatellite markers using CERVUS 3.0 (Kalinowski, Taper, & Marshall, 2007) as  
183 described in Billing et al. (2012). Maximum pedigree depth was 13 generations. We  
184 calculated inbreeding coefficients ( $F_{PED}$ ), which estimate the expected proportion of an  
185 individual's genome that is identical by descent (IBD), based on the MS pedigree for  
186 individuals with two known parents and at least two known grandparents ( $n=1057$  from  
187 Hestmannøy and  $n=138$  from Træna, Table 1) using the R package *pedigree* (Coster, 2012).  
188 We also selected a subset of individuals with at least two full ancestral generations (i.e. four  
189 known grandparents) to only include the most robust estimates of  $F_{PED}$  ( $n=313$  from  
190 Hestmannøy and  $n=7$  from Træna).

#### 191 *Genomic inbreeding estimation*

192 Starting from year 1997 (Hestmannøy) or 2004 (Træna), birds that survived until  
193 recruitment ( $n=275$  from Hestmannøy and  $n=96$  from Træna) were genotyped for 200,000  
194 Single Nucleotide Polymorphisms (SNPs) as described in Lundregan et al. (2018). Two  
195 genomic inbreeding coefficients were then estimated using 118,810 autosomal SNPs not in



196 strong linkage disequilibrium, as described in Niskanen et al. (2020). The weighted average  
197 homozygosity over all loci from the genomic relationship matrix ( $F_{GRM}$ ) was estimated for  
198 the whole metapopulation simultaneously using the GCTA software (Yang, Lee, Goddard, &  
199 Visscher, 2011).  $F_{GRM}$  gives more weight to homozygotes of the minor allele than of the  
200 major allele, and it is an estimate of the correlation between homologous genes of the two  
201 gametes of an individual relative to the current population (Yang et al., 2011).  $F_{GRM}$  can be  
202 negative if the probability that the two homologous genes of an individual are IBD is smaller  
203 than that of two homologous genes being drawn at random from the reference population  
204 (Wang, 2014; Yang et al., 2011). Thus, the individuals with the smallest estimates of  $F_{GRM}$   
205 are expected to be outbred (hybrids) because of e.g. mating involving immigrants (Wang,  
206 2014). The proportion of the genome within runs-of-homozygosity ( $F_{ROH}$  ranging from 0 to  
207 1, McQuillan et al., 2008) was estimated using the PLINK software (Purcell et al., 2007).  
208 ROH arise through mating of individuals that are IBD, and may therefore be used to estimate  
209 inbreeding (Curik, Ferenčaković, & Sölkner, 2014).

## 210 *Statistical analyses*

211 To test whether TL was affected by inbreeding, we fitted linear mixed models  
212 (LMMs) using the package *lme4* (Bates, Mächler, Bolker, & Walker, 2015) in R v. 3.6.3 (R  
213 Core Team, 2020). TL (response variable) was  $\log_{10}$ -transformed to conform to the  
214 assumption of normally distributed residuals and the models were fitted with a (continuous)  
215 fixed effect of one of the inbreeding coefficients ( $F_{PED}$  [ $n=1195$ ],  $F_{PED}$  with at least two full  
216 generations known [ $n=320$ ],  $F_{GRM}$  [ $n=371$ ], or  $F_{ROH}$  [ $n=371$ ], see Table 1 for sample size  
217 details). Since genomic estimators of inbreeding ( $F_{GRM}$  and  $F_{ROH}$ ) were only available for  
218 recruits (first-year survivors), we tested whether the relationship between TL and  $F_{PED}$  varied  
219 between survivors (“1”,  $n=206$ ) and non-survivors (“0”,  $n=989$ ) by including an interaction  
220 effect between  $F_{PED}$  and first-year survival. Tarsus length increases with nestling age, so

221 tarsus length was age-corrected by taking the residuals from a regression of tarsus length on  
222 age and age squared. This allowed us to include both tarsus length and age in the models  
223 describing variation in TL. Thus, age-standardized tarsus length, fledgling age at sampling (in  
224 number of days), hatch day (ordinal date mean centered across years), population identity  
225 (categorical: Hestmannøy or Træna), and sex (categorical: male or female) were included as  
226 fixed effects in all models. We tested whether the effect of inbreeding on TL varied between  
227 sexes and populations by including two-way interaction terms between the inbreeding  
228 coefficient and sex or population identity. Random intercepts were fitted for year and brood  
229 identity to account for the non-independence of nestlings from the same year and brood. This  
230 also controls for within-brood effects of inbreeding levels (Olsson et al., 2018). We then  
231 tested whether the inclusion of the inbreeding coefficient and interaction terms improved the  
232 baseline model (without the inbreeding coefficient) by comparing the resulting 5 candidate  
233 models using Akaike's information criterion corrected for small sample sizes ( $AICc$ , Akaike,  
234 1973; Hurvich & Tsai, 1989). Akaike weights ( $w$ ) and evidence ratios ( $ER$ ) were calculated to  
235 determine the relative fit of models to the data (Burnham & Anderson, 2002). To investigate  
236 heterosis effects on TL, we tested if the slopes of the regression between  $F_{GRM}$  and TL  
237 differed between individuals that were more inbred than on average ( $F_{GRM} > \text{mean } F_{GRM}$ ) and  
238 individuals that were less inbred than average ( $F_{GRM} < \text{mean } F_{GRM}$ ). We did this by testing if  
239 the inclusion of a regression break point at the mean  $F_{GRM}$  improved the models by  
240 comparing the resulting 9 candidate models using  $AICc$ . Models were validated visually  
241 using diagnostic plots of residuals, and model parameters are from models refitted with  
242 restricted maximum likelihood (REML). Estimates are reported with standard errors (SE) and  
243 95% confidence intervals (CI). Regression lines were visualized using *ggplot2* (Wickham,  
244 2016).

245

## 246 RESULTS

247 Individual MS pedigree-based inbreeding coefficients ( $F_{PED}$ ) varied from 0.000-0.250  
248 (mean 0.007, 16.9% non-zero values). The highest ranked model explaining variation in TL  
249 included a negative effect of  $F_{PED}$ , but only slightly improved the fit of the baseline model  
250 ( $\Delta_{2:1}AICc=0.8$  [subscripts denote which ranked models are compared],  $w_1=0.36$ ,  
251  $ER_1=w_1/w_2=1.49$ , Table S1 in the supporting information). Thus, there was a tendency for TL  
252 to be shorter in more inbred sparrows ( $\beta_{F_{PED}}=-0.169\pm 0.101$ , CI=[-0.366, 0.028],  $n=1195$ ,  
253 Fig. 1a and Table 2). The model ranked third ( $\Delta_{3:1}AICc=1.3$ ) indicated that TL was less  
254 associated with  $F_{PED}$  in males than in females ( $\beta_{F_{PED}*sex[female]}=-0.167\pm 0.196$ , CI=[-0.549,  
255 0.216]), while the model ranked fourth ( $\Delta_{4:1}AICc=1.9$ ) indicated that TL was less associated  
256 with  $F_{PED}$  in the Hestmannøy population than in the Træna population  
257 ( $\beta_{F_{PED}*island[Hestmannøy]}=0.115\pm 0.314$ , CI=[-0.498, 0.728]). However, due to high uncertainty  
258 in these parameter estimates, these effects are not deemed reliable.

259 When only including individuals with at least 2 full ancestral generations known  
260 (33.8% non-zero values), the model with  $F_{PED}$  was ranked second ( $\Delta_{2:1}AICc=1.1$ ,  $\beta_{F_{PED}}=-$   
261  $0.205\pm 0.198$ , CI=[-0.588, 0.189],  $n=320$ , Fig. 1b, Table S2-3) and the baseline model was  
262 highest ranked.

263 There was a tendency for the negative effect of  $F_{PED}$  on TL to be weaker in first-year  
264 survivors ( $n=206$ , mean TL= $0.95\pm 0.02$ , mean  $F_{PED}=0.010\pm 0.003$ ) than in non-survivors  
265 ( $n=989$ , mean TL= $0.97\pm 0.01$ , mean  $F_{PED}=0.007\pm 0.001$ ,  $\beta_{F_{PED}*first-year\ survival}=-0.304\pm 0.201$ ,  
266 CI=[-0.089, 0.697],  $n=1195$ , Fig. 1c, Table S4). This effect was uncertain with a CI  
267 overlapping zero. This suggests that the following analyses using genomic estimators of  
268 inbreeding in recruits were not biased towards stronger inbreeding effects in recruits.

269 Genomic inbreeding coefficient ( $F_{GRM}$ ) estimates varied from -0.200 to 0.300 (mean  
270 0.016). The highest ranked model ( $\Delta_{2:1}AICc=2.1$ , Table S5) showed that TL was shorter in

271 more inbred sparrows ( $\beta_{F_{GRM}}=-1.517\pm 0.293$ ,  $CI=[-2.150, -0.920]$ ,  $n=371$ , Fig. 1d, and Table  
272 3). In addition, the effect of  $F_{GRM}$  on TL was stronger in the Træna population  
273 ( $\beta_{F_{GRM}*island[Hestmannøy]}=-0.824\pm 0.339$ ,  $CI=[0.142, 1.529]$ , Table 3) and in males  
274 ( $\beta_{F_{GRM}*sex[female]}=0.644\pm 0.314$ ,  $CI=[0.034, 1.262]$ , Table 3).

275 Including a break point at the mean  $F_{GRM}$  improved the model compared to a model  
276 with no break point (comparing models without interaction terms which were ranked 8 and 5:  
277  $\Delta_{8:5}AICc=4.5$ , see Table S6). The highest ranked model ( $\Delta_{2:1}AICc=3.1$ , Table S6) revealed a  
278 strong negative association between TL and  $F_{GRM}$  among individuals with  $F_{GRM}<0.016$  but no  
279 significant association among inbred individuals with  $F_{GRM}>0.016$  (Fig. 1e and Table 4). This  
280 indicates that a heterosis effect resulting in longer telomeres in outbred individuals may  
281 explain the negative association found between inbreeding and TL. This model also included  
282 an interaction term suggesting that this heterosis effect was stronger in the Træna population  
283 (Table 4).

284 The runs-of-homozygosity inbreeding coefficient ( $F_{ROH}$ ) estimates varied from 0.000-  
285 0.240 (mean 0.010, 73% non-zero values). The best model provided evidence for a negative  
286 effect of  $F_{ROH}$  on TL ( $\beta_{F_{ROH}}=-1.148\pm 0.512$ ,  $CI=[-2.144, -0.153]$ ,  $n=371$ , Fig. 1f, Table S7  
287 and 5). This model also indicated that the negative effect of  $F_{ROH}$  tended to be stronger in  
288 males ( $\beta_{F_{ROH}*sex[female]}=0.915\pm 0.610$ ,  $CI=[-0.270, 2.102]$ ).

289 Overall,  $F_{PED}$  was not a good predictor of genomic estimators of inbreeding (Fig.  
290 S1a,c; Pearson's  $r_p=0.05$ ,  $n=371$ ), but its relationships with  $F_{GRM}$  and  $F_{ROH}$  were improved  
291 when including only individuals with at least two generations known (Fig. S1b,d;  $r_p>0.30$ ,  
292  $n=59$ ).  $F_{GRM}$  and  $F_{ROH}$  were strongly correlated (Fig. S1e,f;  $r_p=0.7$ ,  $n=371$ ).

293

294 **DISCUSSION**

295 We found evidence across multiple complementary measures of inbreeding that more  
296 inbred house sparrow nestlings had shorter telomeres (Fig. 1). Individual differences in TL  
297 are established early in life (Entringer, de Punder, Buss, & Wadhwa, 2018), are heritable  
298 (Dugdale & Richardson, 2018; Pepke et al., *submitted* 2021a), and are positively associated  
299 with fitness in some species (Heidinger et al., 2012; Wilbourn et al., 2018). Thus, short  
300 telomeres in more inbred individuals may therefore underpin a physiological basis of  
301 inbreeding depression in fitness components that has been found in this species (Billing et al.,  
302 2012; Jensen et al., 2007; Niskanen et al., 2020) and in other wild animal populations (Keller  
303 & Waller, 2002).

304 The effect of inbreeding on TL in house sparrows was negative across all measures of  
305 inbreeding, but strongest when using genomic levels of inbreeding (Fig. 1d-f), probably  
306 because they are better at capturing homozygosity causing inbreeding depression compared  
307 to using a pedigree-based estimator (Fig. 1a-c, Alemu et al., 2021; Huisman, Kruuk, Ellis,  
308 Clutton-Brock, & Pemberton, 2016; Kardos et al., 2016). Mating between full siblings or  
309 between parent and offspring ( $F=0.25$ ) resulted in a severe reduction in (relative) TL of 58%  
310 ( $F_{GRM}$ ), 48% ( $F_{ROH}$ ) or 11% ( $F_{PED}$ ) compared to breeding between unrelated individuals  
311 (Tables 2, 3, and 5). TL may be under strong selection in natural populations (Voillemot et  
312 al., 2012). Consequently, strong inbreeding depression is expected for fitness components or  
313 traits that are under strong selection (Bérénos, Ellis, Pilkington, & Pemberton, 2016; DeRose  
314 & Roff, 1999). The analyses using genomic estimators of inbreeding were limited to recruited  
315 individuals, but the negative effect of inbreeding on TL may be even stronger if very inbred  
316 individuals, presumably with short telomeres, do not survive their first year and were thus  
317 excluded from our analyses (Jensen et al., 2007; Wilbourn et al., 2018). There was a tendency  
318 for such an effect when using pedigree-based levels of inbreeding (Fig. 1c and Table S4). We  
319 also found some evidence that inbreeding had stronger negative effects on TL in males than

320 females (Tables 3 and 5). Such sex-specific effects of inbreeding are known from other  
321 species (de Boer et al., 2018a; de Boer et al., 2018b; Janicke, Vellnow, Sarda, & David,  
322 2013), but have rarely been observed early in life. There was a weak tendency for longer TL  
323 in males than females (Tables 2-5), which has been observed in similar house sparrow  
324 populations (Pepke et al., *submitted* 2021b). Thus, males may be better buffered against the  
325 effects of inbreeding on TL. However, no sex-specific differences in inbreeding depression  
326 were observed in adult sparrows across this study metapopulation (Niskanen et al., 2020).

327         Increased inbreeding may be accompanied by population decline in small populations  
328 (Bozzuto et al., 2019; Chen, Cosgrove, Bowman, Fitzpatrick, & Clark, 2016; Feng et al.,  
329 2019), which can drive populations to extinction (O’Grady et al., 2006; Saccheri et al., 1998;  
330 Wright, Tregenza, & Hosken, 2007). Niskanen et al. (2020) showed that inbreeding  
331 depression in adult sparrows in our study system varied little across years or across the  
332 different island environments inhabited by these house sparrows. Hence, the strength of  
333 inbreeding depression is similar between populations, but due to harboring more inbred  
334 individuals, the relative effect is stronger in smaller populations (Niskanen et al., 2020).  
335 Small declining populations may be characterized by gradual population-wide and trans-  
336 generational telomere erosion. For instance, Dupoué et al. (2017) observed shorter TL along  
337 an extinction risk gradient in populations of common lizards (*Zootoca vivipara*) that are  
338 disappearing from low altitudes at their southern range limit, presumably due to climate  
339 warming (Sinervo et al., 2010). Combined, these results suggest that TL may represent a  
340 potential physiological biomarker or molecular tool in conservation genetics addressing the  
341 viability of some small animal populations (Bebbington et al., 2016; Bergman et al., 2019;  
342 Dupoué et al., 2017; Madliger, Franklin, Love, & Cooke, 2020).

343         The negative effect of  $F_{GRM}$  on TL (Fig. 1d) was stronger among individuals that were  
344 less related than the average population (Fig. 1e). This suggests that longer telomeres in

345 outbred individuals may partly be attributed to a general heterosis effect (Charlesworth &  
346 Willis, 2009) involving mating between immigrants and native individuals (Dickel et al.,  
347 2021; Ebert et al., 2002). In our study metapopulation, the proportion of dispersers among  
348 recruits can be high among the island populations (0.2 on average ranging from 0.0-1.0  
349 across years and islands, Ranke et al., 2021; Saatoglu et al., 2021), and hence most islands are  
350 not strongly differentiated (Niskanen et al., 2020). We found that the negative effect of  $F_{GRM}$   
351 on TL was stronger in the Træna population (Table 3-4). Træna is known to have a higher  
352 proportion of immigrants than Hestmannøy (Ranke et al., 2021), which may contribute to a  
353 stronger effect of heterosis in this population (Table 4). Furthermore, the gardens of Træna  
354 expose the sparrows to a different environment than the farms on Hestmannøy (Araya-Ajoy  
355 et al., 2019; Pärn, Ringsby, Jensen, & Sæther, 2012). Inbreeding depression is expected to  
356 have more severe consequences under environmental stress (Armbruster & Reed, 2005; Reed  
357 et al., 2002), such as harsh weather or competition (de Boer et al., 2018a; Fox & Reed, 2011;  
358 Marr, Arcese, Hochachka, Reid, & Keller, 2006). Telomeres shorten due to environmental  
359 stressors such as harsh abiotic conditions (Chatelain et al., 2020). We speculate that  
360 environmental differences between the habitats of the two sparrow populations may explain  
361 the exacerbated effects of inbreeding on TL in the Træna population. For instance, in juvenile  
362 Seychelles warblers a negative relationship between homozygosity and TL was found only in  
363 poor seasons, i.e. when food availability was low (Bebbington et al., 2016). In adult  
364 Seychelles warblers, the effect of homozygosity on TL was consistently negative across  
365 seasons, suggesting that the negative effects of inbreeding accumulate through life and are  
366 reflected in telomere erosion (Bebbington et al., 2016). Here, we showed that inbreeding  
367 manifests in TL already at the nestling stage in a similar wild passerine.

368         We measured TL in blood, thus it is possible that inbreeding or heterosis only affected  
369 telomeres in erythrocytes (Manning et al., 2002; Olsson, Geraghty, Wapstra, & Wilson,

370 2020). However, this is unlikely because TLs often correlate well across tissues within the  
371 organism (Daniali et al., 2013; Demanelis et al., 2020; Reichert, Criscuolo, Verinaud, Zahn,  
372 & Massemin, 2013), especially in early-life (Prowse & Greider, 1995). Although genomic  
373 inbreeding estimates were only available for first-year survivors, we may have avoided  
374 confounding effects of selective mortality of inbred individuals at much older ages by  
375 measuring TL already at the nestling stage (Hemmings, Slate, & Birkhead, 2012; Sánchez-  
376 Montes et al., 2020). Furthermore, since the mutation accumulation theory of senescence  
377 predicts that deleterious effects of inbreeding increase with age (Charlesworth & Hughes,  
378 1996; Keller, Reid, & Arcese, 2008), we may expect that the effect on TL is persistent and  
379 potentially stronger in adult sparrows. Thus, future studies are required to investigate if  
380 inbreeding leads to persistently eroded TL throughout life, and if there are combined fitness  
381 consequences of any interaction between TL and inbreeding in wild populations. Even in the  
382 absence of a mechanism directly linking inbreeding and TL via the effects of oxidative stress  
383 (cf. the introduction), we may find inbred individuals to have short telomeres, because  
384 inbreeding impairs other physiological processes that affects both fitness and TL (Bebbington  
385 et al., 2016). Thus, the conflicting evidence in the literature of an effect of inbreeding on TL  
386 (reviewed in the introduction) suggests that an experimental procedure is needed to further  
387 elucidate the mechanisms underlying the correlation reported here (Manning et al., 2002),  
388 especially in wild populations.

389 In conclusion, the negative associations between inbreeding levels and TL found in  
390 this study suggest that TL may reveal subtle somatic costs of inbreeding in wild populations,  
391 and thereby demonstrates a potential route by which inbreeding negatively impacts the  
392 physiological state of an organism in early life. The observation of a potential heterosis effect  
393 on TL suggests that maintenance of dispersal within this metapopulation is important for  
394 mitigating the negative effects of inbreeding.



395

396 **DECLARATIONS**

397 **Funding:** This work was funded by the Research Council of Norway (274930 and 302619)  
398 and through its Centres of Excellence scheme (223257).

399 **Conflicts of interest:** The authors have no conflicts of interest to declare.

400 **Availability of data and material:** Data will be available on Dryad or another open data  
401 repository.

402 **Code availability:** Not applicable.

403 **Authors' contributions:** MLP measured telomeres, analyzed data, and wrote the manuscript  
404 with contributions from all authors. WB supervised telomere measurements. HJ, AKN, and  
405 TK contributed to the genotype data processing, pedigree construction, and in designing  
406 statistical analyses. THR, BE-S, and HJ initiated the study system. THR, HJ, and TK  
407 contributed to the fieldwork.

408 **Ethics approval:** Fieldwork was carried out in accordance with permits from the Ringing  
409 Centre at Stavanger Museum and the Norway Norwegian Animal Research Authority.

410 **Consent to participate:** Not applicable.

411 **Consent for publication:** Not applicable.

412

413 **REFERENCES**

- 414 Akaike, H. (1973). *Information theory and an extension of the maximum likelihood principle*.  
415 Paper presented at the Second International Symposium on Information Theory,  
416 Akademiai Kiado, Budapest.  
417 Alemu, S. W., Kadri, N. K., Harland, C., Faux, P., Charlier, C., Caballero, A., & Druet, T.  
418 (2021). An evaluation of inbreeding measures using a whole-genome sequenced cattle  
419 pedigree. *Heredity*, 126(3), 410-423. doi:10.1038/s41437-020-00383-9

- 420 Angelier, F., Vleck, C. M., Holberton, R. L., & Marra, P. P. (2013). Telomere length, non-  
421 breeding habitat and return rate in male American redstarts. *Functional Ecology*,  
422 27(2), 342-350. doi:10.1111/1365-2435.12041
- 423 Araya-Ajoy, Y. G., Niskanen, A. K., Froy, H., Ranke, P. S., Kvalnes, T., Rønning, B., Pepke,  
424 M. L., Jensen, H., Ringsby, T. H., Sæther, B.-E., & Wright, J. (2021). Variation in  
425 generation time reveals density regulation as an important driver of pace-of-life in a  
426 bird metapopulation. *Ecol Lett*. doi:10.1111/ele.13835
- 427 Araya-Ajoy, Y. G., Ranke, P. S., Kvalnes, T., Rønning, B., Holand, H., Myhre, A. M., Pärn,  
428 H., Jensen, H., Ringsby, T. H., Sæther, B.-E., & Wright, J. (2019). Characterizing  
429 morphological (co)variation using structural equation models: Body size, allometric  
430 relationships and evolvability in a house sparrow metapopulation. *Evolution*, 73(3),  
431 452-466. doi:10.1111/evo.13668
- 432 Armbruster, P., & Reed, D. H. (2005). Inbreeding depression in benign and stressful  
433 environments. *Heredity*, 95(3), 235-242. doi:10.1038/sj.hdy.6800721
- 434 Barnes, R. P., Fouquerel, E., & Opresko, P. L. (2019). The impact of oxidative DNA damage  
435 and stress on telomere homeostasis. *Mechanisms of Ageing and Development*, 177,  
436 37-45. doi:<https://doi.org/10.1016/j.mad.2018.03.013>
- 437 Barrett, E. L., & Richardson, D. S. (2011). Sex differences in telomeres and lifespan. *Aging*  
438 *Cell*, 10(6), 913-921. doi:10.1111/j.1474-9726.2011.00741.x
- 439 Barrett, E. L. B., Burke, T. A., Hammers, M., Komdeur, J., & Richardson, D. S. (2013).  
440 Telomere length and dynamics predict mortality in a wild longitudinal study. *Mol*  
441 *Ecol*, 22(1), 249-259. doi:10.1111/mec.12110
- 442 Bates, D., Mächler, M., Bolker, B., & Walker, S. (2015). Fitting linear mixed-effects models  
443 using lme4. *Journal of Statistical Software*, 67(1), 1-48. doi:10.18637/jss.v067.i01
- 444 Bateson, M. (2016). Cumulative stress in research animals: Telomere attrition as a biomarker  
445 in a welfare context? *Bioessays*, 38(2), 201-212. doi:10.1002/bies.201500127
- 446 Bateson, M., & Poirier, C. (2019). Can biomarkers of biological age be used to assess  
447 cumulative lifetime experience? *Anim. Welf*, 28(1), 41-56.  
448 doi:10.7120/09627286.28.1.041
- 449 Bebbington, K., Spurgin, L. G., Fairfield, E. A., Dugdale, H. L., Komdeur, J., Burke, T., &  
450 Richardson, D. S. (2016). Telomere length reveals cumulative individual and  
451 transgenerational inbreeding effects in a passerine bird. *Mol Ecol*, 25(12), 2949-2960.  
452 doi:10.1111/mec.13670
- 453 Becker, P. J., Reichert, S., Zahn, S., Hegelbach, J., Masseurin, S., Keller, L. F., Postma, E., &  
454 Criscuolo, F. (2015). Mother-offspring and nest-mate resemblance but no heritability  
455 in early-life telomere length in white-throated dippers. *Proc Biol Sci*, 282(1807),  
456 20142924. doi:10.1098/rspb.2014.2924
- 457 Benton, C. H., Delahay, R. J., Smith, F. A. P., Robertson, A., McDonald, R. A., Young, A. J.,  
458 Burke, T. A., & Hodgson, D. (2018). Inbreeding intensifies sex- and age-dependent  
459 disease in a wild mammal. *Journal of Animal Ecology*, 87(6), 1500-1511.  
460 doi:<https://doi.org/10.1111/1365-2656.12878>
- 461 Béréanos, C., Ellis, P. A., Pilkington, J. G., & Pemberton, J. M. (2016). Genomic analysis  
462 reveals depression due to both individual and maternal inbreeding in a free-living  
463 mammal population. *Mol Ecol*, 25(13), 3152-3168. doi:10.1111/mec.13681
- 464 Bergman, J. N., Bennett, J. R., Binley, A. D., Cooke, S. J., Fyson, V., Hlina, B. L., Reid, C.  
465 H., Vala, M. A., & Madliger, C. L. (2019). Scaling from individual physiological  
466 measures to population-level demographic change: Case studies and future directions  
467 for conservation management. *Biological Conservation*, 238, 108242.  
468 doi:<https://doi.org/10.1016/j.biocon.2019.108242>

- 469 Billing, A. M., Lee, A. M., Skjelseth, S., Borg, A. A., Hale, M. C., Slate, J., Parn, H.,  
470 Ringsby, T. H., Saether, B. E., & Jensen, H. (2012). Evidence of inbreeding  
471 depression but not inbreeding avoidance in a natural house sparrow population. *Mol*  
472 *Ecol*, *21*(6), 1487-1499. doi:10.1111/j.1365-294X.2012.05490.x
- 473 Blackburn, E. H., & Gall, J. G. (1978). A tandemly repeated sequence at the termini of the  
474 extrachromosomal ribosomal RNA genes in *Tetrahymena*. *Journal of Molecular*  
475 *Biology*, *120*(1), 33-53. doi:[https://doi.org/10.1016/0022-2836\(78\)90294-2](https://doi.org/10.1016/0022-2836(78)90294-2)
- 476 Boonekamp, J. J., Simons, M. J., Hemerik, L., & Verhulst, S. (2013). Telomere length  
477 behaves as biomarker of somatic redundancy rather than biological age. *Aging Cell*,  
478 *12*(2), 330-332. doi:10.1111/ace.12050
- 479 Bosse, M., Megens, H.-J., Derks, M. F. L., de Cara, Á. M. R., & Groenen, M. A. M. (2018).  
480 Deleterious alleles in the context of domestication, inbreeding, and selection.  
481 *Evolutionary applications*, *12*(1), 6-17. doi:10.1111/eva.12691
- 482 Bozzuto, C., Biebach, I., Muff, S., Ives, A. R., & Keller, L. F. (2019). Inbreeding reduces  
483 long-term growth of Alpine ibex populations. *Nature Ecology & Evolution*, *3*(9),  
484 1359-1364. doi:10.1038/s41559-019-0968-1
- 485 Burnham, K. P., & Anderson, D. R. (2002). *Model selection and multimodel inference. A*  
486 *practical information-theoretic approach* (2 ed.). New York, U.S.A.: Springer-  
487 Verlag.
- 488 Cawthon, R. M. (2002). Telomere measurement by quantitative PCR. *Nucleic Acids*  
489 *Research*, *30*(10), e47. doi:10.1093/nar/30.10.e47
- 490 Červenák, F., Sepšiová, R., Nosek, J., & Tomáška, L. (2021). Step-by-step evolution of  
491 telomeres: Lessons from yeasts. *Genome Biology and Evolution*, *13*(2).  
492 doi:10.1093/gbe/evaa268
- 493 Charlesworth, B., & Hughes, K. A. (1996). Age-specific inbreeding depression and  
494 components of genetic variance in relation to the evolution of senescence.  
495 *Proceedings of the National Academy of Sciences of the United States of America*,  
496 *93*(12), 6140-6145. doi:10.1073/pnas.93.12.6140
- 497 Charlesworth, D., & Willis, J. H. (2009). The genetics of inbreeding depression. *Nature*  
498 *Reviews Genetics*, *10*(11), 783-796. doi:10.1038/nrg2664
- 499 Charpentier, M. J. E., Williams, C. V., & Drea, C. M. (2008). Inbreeding depression in ring-  
500 tailed lemurs (*Lemur catta*): genetic diversity predicts parasitism,  
501 immunocompetence, and survivorship. *Conservation Genetics*, *9*(6), 1605-1615.  
502 doi:10.1007/s10592-007-9499-4
- 503 Chatelain, M., Drobniak, S. M., & Szulkin, M. (2020). The association between stressors and  
504 telomeres in non-human vertebrates: a meta-analysis. *Ecol Lett*, *23*(2), 381-398.  
505 doi:10.1111/ele.13426
- 506 Chen, N., Cosgrove, Elissa J., Bowman, R., Fitzpatrick, John W., & Clark, Andrew G.  
507 (2016). Genomic consequences of population decline in the endangered Florida scrub-  
508 jay. *Current Biology*, *26*(21), 2974-2979.  
509 doi:<https://doi.org/10.1016/j.cub.2016.08.062>
- 510 Coster, A. (2012). pedigree: Pedigree functions. R package version 1.4. [https://CRAN.R-](https://CRAN.R-project.org/package=pedigree)  
511 [project.org/package=pedigree](https://CRAN.R-project.org/package=pedigree).
- 512 Criscuolo, F., Bize, P., Nasir, L., Metcalfe, N. B., Foote, C. G., Griffiths, K., Gault, E. A., &  
513 Monaghan, P. (2009). Real-time quantitative PCR assay for measurement of avian  
514 telomeres. *Journal of Avian Biology*, *40*(3), 342-347. doi:10.1111/j.1600-  
515 048X.2008.04623.x
- 516 Curik, I., Ferenčaković, M., & Sölkner, J. (2014). Inbreeding and runs of homozygosity: A  
517 possible solution to an old problem. *Livestock Science*, *166*, 26-34.  
518 doi:<https://doi.org/10.1016/j.livsci.2014.05.034>

- 519 Daniali, L., Benetos, A., Susser, E., Kark, J. D., Labat, C., Kimura, M., Desai, K., Granick,  
520 M., & Aviv, A. (2013). Telomeres shorten at equivalent rates in somatic tissues of  
521 adults. *Nat Commun*, 4, 1597. doi:10.1038/ncomms2602
- 522 de Boer, R. A., Costantini, D., Casasole, G., AbdElgawad, H., Asard, H., Eens, M., & Müller,  
523 W. (2018a). Sex-specific effects of inbreeding and early life conditions on the adult  
524 oxidative balance. *Current Zoology*, 64(5), 631-639. doi:10.1093/cz/zox076
- 525 de Boer, R. A., Eens, M., & Müller, W. (2018b). Sex-specific effects of inbreeding on  
526 reproductive senescence. *Proceedings of the Royal Society B: Biological Sciences*,  
527 285(1879), 20180231. doi:10.1098/rspb.2018.0231
- 528 Demanelis, K., Jasmine, F., Chen, L. S., Chernoff, M., Tong, L., Delgado, D., Zhang, C.,  
529 Shinkle, J., Sabarinathan, M., Lin, H., Ramirez, E., Oliva, M., Kim-Hellmuth, S.,  
530 Stranger, B. E., Lai, T.-P., Aviv, A., Ardlie, K. G., Aguet, F., Ahsan, H., Doherty, J.  
531 A., Kibriya, M. G., & Pierce, B. L. (2020). Determinants of telomere length across  
532 human tissues. *Science*, 369(6509), eaaz6876. doi:10.1126/science.aaz6876
- 533 DeRose, M. A., & Roff, D. A. (1999). A comparison of inbreeding depression in life-history  
534 and morphological traits in animals. *Evolution*, 53(4), 1288-1292. doi:10.1111/j.1558-  
535 5646.1999.tb04541.x
- 536 Dickel, L., Arcese, P., Nietlisbach, P., Keller, L. F., Jensen, H., & Reid, J. M. (2021). Are  
537 immigrants outbred and unrelated? Testing standard assumptions in a wild  
538 metapopulation. *Mol Ecol*, n/a(n/a). doi:<https://doi.org/10.1111/mec.16173>
- 539 Dugdale, H. L., & Richardson, D. S. (2018). Heritability of telomere variation: it is all about  
540 the environment! *Philos Trans R Soc Lond B Biol Sci*, 373(1741), 20160450.  
541 doi:10.1098/rstb.2016.0450
- 542 Dupoué, A., Rutschmann, A., Le Galliard, J. F., Clobert, J., Angelier, F., Marciaud, C., Ruault,  
543 S., Miles, D., & Meylan, S. (2017). Shorter telomeres precede population extinction in  
544 wild lizards. *Scientific Reports*, 7(1), 16976. doi:10.1038/s41598-017-17323-z
- 545 Ebert, D., Haag, C., Kirkpatrick, M., Riek, M., Hottinger Jürgen, W., & Pajunen, V. I. (2002).  
546 A selective advantage to immigrant genes in a *Daphnia* metapopulation. *Science*,  
547 295(5554), 485-488. doi:10.1126/science.1067485
- 548 Eisenberg, D. T. (2011). An evolutionary review of human telomere biology: the thrifty  
549 telomere hypothesis and notes on potential adaptive paternal effects. *Am J Hum Biol*,  
550 23(2), 149-167. doi:10.1002/ajhb.21127
- 551 Entringer, S., de Punder, K., Buss, C., & Wadhwa, P. D. (2018). The fetal programming of  
552 telomere biology hypothesis: an update. *Philosophical Transactions of the Royal  
553 Society B: Biological Sciences*, 373(1741), 20170151. doi:10.1098/rstb.2017.0151
- 554 Feng, S., Fang, Q., Barnett, R., Li, C., Han, S., Kuhlwilm, M., Zhou, L., Pan, H., Deng, Y.,  
555 Chen, G., Gamauf, A., Woog, F., Prys-Jones, R., Marques-Bonet, T., Gilbert, M. T.  
556 P., & Zhang, G. (2019). The genomic footprints of the fall and recovery of the crested  
557 ibis. *Current Biology*, 29(2), 340-349.e347.  
558 doi:<https://doi.org/10.1016/j.cub.2018.12.008>
- 559 Forsyth, N. R., Elder, F. F. B., Shay, J. W., & Wright, W. E. (2005). Lagomorphs (rabbits,  
560 pikas and hares) do not use telomere-directed replicative aging in vitro. *Mechanisms  
561 of Ageing and Development*, 126(6), 685-691.  
562 doi:<https://doi.org/10.1016/j.mad.2005.01.003>
- 563 Fox, C. W., & Reed, D. H. (2011). Inbreeding depression increases with environmental  
564 stress: An experimental study and meta-analysis. *Evolution*, 65(1), 246-258.  
565 doi:<https://doi.org/10.1111/j.1558-5646.2010.01108.x>
- 566 Frankham, R. (2015). Genetic rescue of small inbred populations: meta-analysis reveals large  
567 and consistent benefits of gene flow. *Mol Ecol*, 24(11), 2610-2618.  
568 doi:<https://doi.org/10.1111/mec.13139>

- 569 Froy, H., Underwood, S. L., Dorrens, J., Seeker, L. A., Watt, K., Wilbourn, R. V., Pilkington,  
570 J. G., Harrington, L., Pemberton, J. M., & Nussey, D. H. (2021). Heritable variation in  
571 telomere length predicts mortality in Soay sheep. *Proceedings of the National*  
572 *Academy of Sciences*, 118(15), e2020563118. doi:10.1073/pnas.2020563118
- 573 Hall, M. E., Nasir, L., Daunt, F., Gault, E. A., Croxall, J. P., Wanless, S., & Monaghan, P.  
574 (2004). Telomere loss in relation to age and early environment in long-lived birds.  
575 *Proc Biol Sci*, 271(1548), 1571-1576. doi:10.1098/rspb.2004.2768
- 576 Hanson, H. E., Mathews, N. S., Hauber, M. E., & Martin, L. B. (2020). The house sparrow in  
577 the service of basic and applied biology. *Elife*, 9, e52803. doi:10.7554/eLife.52803
- 578 Harley, C. B., Futcher, A. B., & Greider, C. W. (1990). Telomeres shorten during ageing of  
579 human fibroblasts. *Nature*, 345(6274), 458-460. doi:10.1038/345458a0
- 580 Harrisson, K. A., Magrath, M. J. L., Yen, J. D. L., Pavlova, A., Murray, N., Quin, B.,  
581 Menkhorst, P., Miller, K. A., Cartwright, K., & Sunnucks, P. (2019). Lifetime fitness  
582 costs of inbreeding and being inbred in a critically endangered bird. *Current Biology*,  
583 29(16), 2711-2717.e2714. doi:<https://doi.org/10.1016/j.cub.2019.06.064>
- 584 Haussmann, M. F. M., Nicole M. . (2010). Telomeres: Linking stress and survival, ecology  
585 and evolution. *Current Zoology*, 56(6), 714-727.
- 586 Hedrick, P. W., & Kalinowski, S. T. (2000). Inbreeding depression in conservation biology.  
587 *Annual Review of Ecology and Systematics*, 31(1), 139-162.  
588 doi:10.1146/annurev.ecolsys.31.1.139
- 589 Heidinger, B. J., Blount, J. D., Boner, W., Griffiths, K., Metcalfe, N. B., & Monaghan, P.  
590 (2012). Telomere length in early life predicts lifespan. *Proc Natl Acad Sci U S A*,  
591 109(5), 1743-1748. doi:10.1073/pnas.1113306109
- 592 Heidinger, B. J., Kucera, A. C., Kittilson, J. D., & Westneat, D. F. (2021). Longer telomeres  
593 during early life predict higher lifetime reproductive success in females but not males.  
594 *Proceedings of the Royal Society B: Biological Sciences*, 288(1951), 20210560.  
595 doi:10.1098/rspb.2021.0560
- 596 Hellemans, J., Mortier, G., De Paepe, A., Speleman, F., & Vandesompele, J. (2007). qBase  
597 relative quantification framework and software for management and automated  
598 analysis of real-time quantitative PCR data. *Genome Biol*, 8(2), R19. doi:10.1186/gb-  
599 2007-8-2-r19
- 600 Hemann, M. T., & Greider, C. W. (2000). Wild-derived inbred mouse strains have short  
601 telomeres. *Nucleic Acids Research*, 28(22), 4474-4478. doi:10.1093/nar/28.22.4474
- 602 Hemmings, N. L., Slate, J., & Birkhead, T. R. (2012). Inbreeding causes early death in a  
603 passerine bird. *Nature Communications*, 3(1), 863. doi:10.1038/ncomms1870
- 604 Huisman, J., Kruuk, L. E. B., Ellis, P. A., Clutton-Brock, T., & Pemberton, J. M. (2016).  
605 Inbreeding depression across the lifespan in a wild mammal population. *Proceedings*  
606 *of the National Academy of Sciences*, 201518046. doi:10.1073/pnas.1518046113
- 607 Hurvich, C. M., & Tsai, C.-L. (1989). Regression and time series model selection in small  
608 samples. *Biometrika*, 76(2), 297-307. doi:10.1093/biomet/76.2.297
- 609 Janicke, T., Vellnow, N., Sarda, V., & David, P. (2013). Sex-specific inbreeding depression  
610 depends on the strength of male-male competition. *Evolution*, 67(10), 2861-2875.  
611 doi:10.1111/evo.12167
- 612 Jensen, H., Bremset, E. M., Ringsby, T. H., & Sæther, B. E. (2007). Multilocus  
613 heterozygosity and inbreeding depression in an insular house sparrow metapopulation.  
614 *Mol Ecol*, 16(19), 4066-4078. doi:10.1111/j.1365-294X.2007.03452.x
- 615 Kalinowski, S. T., Taper, M. L., & Marshall, T. C. (2007). Revising how the computer  
616 program CERVUS accommodates genotyping error increases success in paternity  
617 assignment. *Mol Ecol*, 16(5), 1099-1106. doi:10.1111/j.1365-294X.2007.03089.x

- 618 Kardos, M., Taylor, H. R., Ellegren, H., Luikart, G., & Allendorf, F. W. (2016). Genomics  
619 advances the study of inbreeding depression in the wild. *Evolutionary applications*,  
620 9(10), 1205-1218. doi:<https://doi.org/10.1111/eva.12414>
- 621 Kawanishi, S., & Oikawa, S. (2004). Mechanism of telomere shortening by oxidative stress.  
622 *Annals of the New York Academy of Sciences*, 1019(1), 278-284.  
623 doi:<https://doi.org/10.1196/annals.1297.047>
- 624 Keller, L. F., Reid, J. M., & Arcese, P. (2008). Testing evolutionary models of senescence in  
625 a natural population: age and inbreeding effects on fitness components in song  
626 sparrows. *Proceedings of the Royal Society B: Biological Sciences*, 275(1635), 597-  
627 604. doi:10.1098/rspb.2007.0961
- 628 Keller, L. F., & Waller, D. M. (2002). Inbreeding effects in wild populations. *Trends in*  
629 *Ecology & Evolution*, 17(5), 230-241. doi:10.1016/S0169-5347(02)02489-8
- 630 Ketola, T., & Kotiaho, J. S. (2009). Inbreeding, energy use and condition. *Journal of*  
631 *Evolutionary Biology*, 22(4), 770-781. doi:<https://doi.org/10.1111/j.1420-9101.2009.01689.x>
- 632
- 633 Kristensen, T. N., Pedersen, K. S., Vermeulen, C. J., & Loeschcke, V. (2010). Research on  
634 inbreeding in the 'omic' era. *Trends in Ecology & Evolution*, 25(1), 44-52.  
635 doi:<https://doi.org/10.1016/j.tree.2009.06.014>
- 636 Kristensen, T. N., Sørensen, P., Kruhøffer, M., Pedersen, K. S., & Loeschcke, V. (2005).  
637 Genome-wide analysis on inbreeding effects on gene expression in *Drosophila*  
638 *melanogaster*. *Genetics*, 171(1), 157-167. doi:10.1534/genetics.104.039610
- 639 López-Otín, C., Blasco, M. A., Partridge, L., Serrano, M., & Kroemer, G. (2013). The  
640 hallmarks of aging. *Cell*, 153(6), 1194-1217. doi:10.1016/j.cell.2013.05.039
- 641 Losdat, S., Arcese, P., Sampson, L., Villar, N., & Reid, J. M. (2016). Additive genetic  
642 variance and effects of inbreeding, sex and age on heterophil to lymphocyte ratio in  
643 song sparrows. *Functional Ecology*, 30(7), 1185-1195.  
644 doi:<https://doi.org/10.1111/1365-2435.12586>
- 645 Lundregan, S. L., Hagen, I. J., Gohli, J., Niskanen, A. K., Kemppainen, P., Ringsby, T. H.,  
646 Kvalnes, T., Pärn, H., Rønning, B., Holand, H., Ranke, P. S., Båtnes, A. S., Selvik,  
647 L.-K., Lien, S., Sæther, B.-E., Husby, A., & Jensen, H. (2018). Inferences of genetic  
648 architecture of bill morphology in house sparrow using a high-density SNP array  
649 point to a polygenic basis. *Mol Ecol*, 27(17), 3498-3514. doi:10.1111/mec.14811
- 650 Madliger, C. L., Franklin, C. E., Love, O. P., & Cooke, S. J. (2020). *Conservation*  
651 *physiology: Applications for wildlife conservation and management*: Oxford  
652 University Press, USA.
- 653 Manning, E. L., Crossland, J., Dewey, M. J., & Van Zant, G. (2002). Influences of inbreeding  
654 and genetics on telomere length in mice. *Mammalian Genome*, 13(5), 234-238.  
655 doi:10.1007/s003350020027
- 656 Mansour, H., Chowdari, K., Fathi, W., Elassy, M., Ibrahim, I., Wood, J., Bamne, M., Tobar,  
657 S., Yassin, A., Salah, H., Elsayed, H., Eissa, A., El-Boraie, H., Ibrahim, N. E.,  
658 Elsayed, M., El-Bahaei, W., Gomaa, Z., El-Chennawi, F., & Nimgaonkar, V. L.  
659 (2011). Does telomere length mediate associations between inbreeding and increased  
660 risk for bipolar I disorder and schizophrenia? *Psychiatry Research*, 188(1), 129-132.  
661 doi:<https://doi.org/10.1016/j.psychres.2011.01.010>
- 662 Marr, A. B., Arcese, P., Hochachka, W. M., Reid, J. M., & Keller, L. F. (2006). Interactive  
663 effects of environmental stress and inbreeding on reproductive traits in a wild bird  
664 population. *Journal of Animal Ecology*, 75(6), 1406-1415.  
665 doi:<https://doi.org/10.1111/j.1365-2656.2006.01165.x>
- 666 McLennan, D., Auer, S. K., McKelvey, S., McKelvey, L., Anderson, G., Boner, W., Duprez,  
667 J. S., & Metcalfe, N. B. (2021). Habitat restoration weakens negative environmental

- 668 effects on telomere dynamics. *Mol Ecol*, n/a(n/a).  
669 doi:<https://doi.org/10.1111/mec.15980>
- 670 McQuillan, R., Leutenegger, A.-L., Abdel-Rahman, R., Franklin, C. S., Pericic, M., Barac-  
671 Lauc, L., Smolej-Narancic, N., Janicijevic, B., Polasek, O., Tenesa, A., MacLeod, A.  
672 K., Farrington, S. M., Rudan, P., Hayward, C., Vitart, V., Rudan, I., Wild, S. H.,  
673 Dunlop, M. G., Wright, A. F., Campbell, H., & Wilson, J. F. (2008). Runs of  
674 homozygosity in European populations. *The American Journal of Human Genetics*,  
675 83(3), 359-372. doi:10.1016/j.ajhg.2008.08.007
- 676 Monaghan, P. (2014). Organismal stress, telomeres and life histories. *J Exp Biol*, 217(Pt 1),  
677 57-66. doi:10.1242/jeb.090043
- 678 Monaghan, P., & Ozanne, S. E. (2018). Somatic growth and telomere dynamics in  
679 vertebrates: relationships, mechanisms and consequences. *Philos Trans R Soc Lond B*  
680 *Biol Sci*, 373(1741), 20160446. doi:10.1098/rstb.2016.0446
- 681 Moyers, B. T., Morrell, P. L., & McKay, J. K. (2018). Genetic costs of domestication and  
682 improvement. *Journal of Heredity*, 109(2), 103-116. doi:10.1093/jhered/esx069
- 683 Niskanen, A. K., Billing, A. M., Holand, H., Hagen, I. J., Araya-Ajoy, Y. G., Husby, A.,  
684 Rønning, B., Myhre, A. M., Ranke, P. S., Kvalnes, T., Pärn, H., Ringsby, T. H., Lien,  
685 S., Sæther, B.-E., Muff, S., & Jensen, H. (2020). Consistent scaling of inbreeding  
686 depression in space and time in a house sparrow metapopulation. *Proceedings of the*  
687 *National Academy of Sciences*, 117(25), 14584. doi:10.1073/pnas.1909599117
- 688 Nuzhdin, S. V., & Reiwitich, S. G. (2002). Heterosis of quantitative trait loci affecting  
689 lifespan in *Drosophila melanogaster*. *Russian Journal of Genetics*, 38(7), 766-770.  
690 doi:10.1023/A:1016335504009
- 691 O'Grady, J. J., Brook, B. W., Reed, D. H., Ballou, J. D., Tonkyn, D. W., & Frankham, R.  
692 (2006). Realistic levels of inbreeding depression strongly affect extinction risk in wild  
693 populations. *Biological Conservation*, 133(1), 42-51.  
694 doi:<https://doi.org/10.1016/j.biocon.2006.05.016>
- 695 O'Hare, T. H., & Delany, M. E. (2009). Genetic variation exists for telomeric array  
696 organization within and among the genomes of normal, immortalized, and  
697 transformed chicken systems. *Chromosome Research*, 17(8), 947.  
698 doi:10.1007/s10577-009-9082-6
- 699 Okada, K., Blount, J. D., Sharma, M. D., Snook, R. R., & Hosken, D. J. (2011). Male  
700 attractiveness, fertility and susceptibility to oxidative stress are influenced by  
701 inbreeding in *Drosophila simulans*. *Journal of Evolutionary Biology*, 24(2), 363-371.  
702 doi:<https://doi.org/10.1111/j.1420-9101.2010.02170.x>
- 703 Olsson, M., Geraghty, N. J., Wapstra, E., & Wilson, M. (2020). Telomere length varies  
704 substantially between blood cell types in a reptile. *R Soc Open Sci*, 7(6), 192136.  
705 doi:10.1098/rsos.192136
- 706 Olsson, M., Wapstra, E., & Friesen, C. R. (2018). Evolutionary ecology of telomeres: a  
707 review. *Annals of the New York Academy of Sciences*, 1422(1), 5-28.  
708 doi:10.1111/nyas.13443
- 709 Ozawa, Y., Watanabe, K., Toda, T., Shibuya, S., Okumura, N., Okamoto, N., Sato, Y.,  
710 Kawashima, I., Kawamura, K., & Shimizu, T. (2019). Heterosis extends the  
711 reproductive ability in aged female mice. *Biology of Reproduction*, 100(4), 1082-  
712 1089. doi:10.1093/biolre/iory260
- 713 Pedersen, K. S., Kristensen, T. N., Loeschcke, V., Petersen, B. O., Duus, J. Ø., Nielsen, N.  
714 C., & Malmendal, A. (2008). Metabolomic signatures of inbreeding at benign and  
715 stressful temperatures in *Drosophila melanogaster*. *Genetics*, 180(2), 1233-1243.  
716 doi:10.1534/genetics.108.089144

- 717 Pepke, M. L., & Eisenberg, D. T. A. (2021). On the comparative biology of mammalian  
718 telomeres: Telomere length co-evolves with body mass, lifespan and cancer risk. *Mol*  
719 *Ecol.* doi:10.1111/mec.15870
- 720 Pepke, M. L., Kvalnes, T., Lundregan, S. L., Boner, W., Monaghan, P., Sæther, B.-E., Jensen,  
721 H., & Ringsby, T. H. (submitted 2021a). Genetic architecture and heritability of early-  
722 life telomere length in a wild passerine. *Preprint on Authorea*.  
723 doi:10.22541/au.161961744.48479988/v1
- 724 Pepke, M. L., Kvalnes, T., Rønning, B., Jensen, H., Boner, W., Sæther, B.-E., Monaghan, P.,  
725 & Ringsby, T. H. (submitted 2021b). Artificial size selection experiment reveals  
726 telomere length dynamics and fitness consequences in a wild passerine. *Preprint on*  
727 *Authorea*. doi:10.22541/au.161447476.67562312/v1
- 728 Pepke, M. L., Ringsby, T. H., & Eisenberg, D. T. A. (2021). Early-life telomere length  
729 covaries with life-history traits and scales with chromosome length in birds. *bioRxiv*,  
730 2021.2008.2007.455497. doi:10.1101/2021.08.07.455497
- 731 Pepper, G. V., Bateson, M., & Nettle, D. (2018). Telomeres as integrative markers of  
732 exposure to stress and adversity: a systematic review and meta-analysis. *R Soc Open*  
733 *Sci*, 5(8), 180744. doi:10.1098/rsos.180744
- 734 Prowse, K. R., & Greider, C. W. (1995). Developmental and tissue-specific regulation of  
735 mouse telomerase and telomere length. *Proceedings of the National Academy of*  
736 *Sciences*, 92(11), 4818. doi:10.1073/pnas.92.11.4818
- 737 Purcell, S., Neale, B., Todd-Brown, K., Thomas, L., Ferreira, M. A. R., Bender, D., Maller,  
738 J., Sklar, P., de Bakker, P. I. W., Daly, M. J., & Sham, P. C. (2007). PLINK: A tool  
739 set for whole-genome association and population-based linkage analyses. *The*  
740 *American Journal of Human Genetics*, 81(3), 559-575.  
741 doi:<https://doi.org/10.1086/519795>
- 742 Pärn, H., Ringsby, T. H., Jensen, H., & Sæther, B.-E. (2012). Spatial heterogeneity in the  
743 effects of climate and density-dependence on dispersal in a house sparrow  
744 metapopulation. *Proceedings of the Royal Society B: Biological Sciences*, 279(1726),  
745 144-152. doi:10.1098/rspb.2011.0673
- 746 R Core Team. (2020). R: A language and environment for statistical computing. (Version  
747 3.6.3). Vienna, Austria.: R Foundation for Statistical Computing. Retrieved from  
748 [www.R-project.org/](http://www.R-project.org/)
- 749 Ranke, P. S., Araya-Ajoy, Y. G., Ringsby, T. H., Pärn, H., Rønning, B., Jensen, H., Wright,  
750 J., & Sæther, B.-E. (2021). Spatial structure and dispersal dynamics in a house  
751 sparrow metapopulation. *Journal of Animal Ecology*, n/a(n/a).  
752 doi:<https://doi.org/10.1111/1365-2656.13580>
- 753 Ravinet, M., Elgvin Tore, O., Trier, C., Aliabadian, M., Gavrilov, A., & Sætre, G.-P. (2018).  
754 Signatures of human-commensalism in the house sparrow genome. *Proceedings of the*  
755 *Royal Society B: Biological Sciences*, 285(1884), 20181246.  
756 doi:10.1098/rspb.2018.1246
- 757 Reed, D. H., Briscoe, D. A., & Frankham, R. (2002). Inbreeding and extinction: The effect of  
758 environmental stress and lineage. *Conservation Genetics*, 3(3), 301-307.  
759 doi:10.1023/A:1019948130263
- 760 Reichert, S., Criscuolo, F., Verinaud, E., Zahn, S., & Massemin, S. (2013). Telomere length  
761 correlations among somatic tissues in adult zebra finches. *PLoS One*, 8(12), e81496.  
762 doi:10.1371/journal.pone.0081496
- 763 Reichert, S., & Stier, A. (2017). Does oxidative stress shorten telomeres in vivo? A review.  
764 *Biology Letters*, 13(12), 20170463. doi:10.1098/rsbl.2017.0463
- 765 Reid, J. M., Arcese, P., & Keller, L. F. (2003). Inbreeding depresses immune response in  
766 song sparrows (*Melospiza melodia*): direct and inter-generational effects.



- 767 *Proceedings of the Royal Society of London. Series B: Biological Sciences*,  
768 270(1529), 2151-2157. doi:10.1098/rspb.2003.2480
- 769 Remot, F., Ronget, V., Froy, H., Rey, B., Gaillard, J.-M., Nussey, D. H., & Lemaître, J.-F.  
770 (2021). Decline in telomere length with increasing age across non-human vertebrates:  
771 a meta-analysis. *Mol Ecol*, n/a(n/a). doi:<https://doi.org/10.1111/mec.16145>
- 772 Remot, F., Ronget, V., Froy, H., Rey, B., Gaillard, J. M., Nussey, D. H., & Lemaitre, J. F.  
773 (2020). No sex differences in adult telomere length across vertebrates: a meta-  
774 analysis. *R Soc Open Sci*, 7(11), 200548. doi:10.1098/rsos.200548
- 775 Ringsby, T. H., Jensen, H., Pärn, H., Kvalnes, T., Boner, W., Gillespie, R., Holand, H.,  
776 Hagen, I. J., Rønning, B., Sæther, B. E., & Monaghan, P. (2015). On being the right  
777 size: increased body size is associated with reduced telomere length under natural  
778 conditions. *Proc Biol Sci*, 282(1820), 20152331. doi:10.1098/rspb.2015.2331
- 779 Ringsby, T. H., Sæther, B.-E., Jensen, H., & Engen, S. (2006). Demographic characteristics  
780 of extinction in a small, insular population of house sparrows in northern Norway.  
781 *Conservation Biology*, 20(6), 1761-1767. doi:10.1111/j.1523-1739.2006.00568.x
- 782 Rising, J. D., & Somers, K. M. (1989). The measurement of overall body size in birds. *The*  
783 *Auk*, 106(4), 666-674.
- 784 Saccheri, I., Kuussaari, M., Kankare, M., Vikman, P., Fortelius, W., & Hanski, I. (1998).  
785 Inbreeding and extinction in a butterfly metapopulation. *Nature*, 392(6675), 491-494.  
786 doi:10.1038/33136
- 787 Sánchez-Montes, G., Martínez-Solano, Í., Díaz-Paniagua, C., Vilches, A., Ariño, A. H., &  
788 Gomez-Mestre, I. (2020). Telomere attrition with age in a wild amphibian population.  
789 *Biology Letters*, 16(7), 20200168. doi:10.1098/rsbl.2020.0168
- 790 Seluanov, A., Hine, C., Bozzella, M., Hall, A., Sasahara, T. H. C., Ribeiro, A. A. C. M.,  
791 Catania, K. C., Presgraves, D. C., & Gorbunova, V. (2008). Distinct tumor suppressor  
792 mechanisms evolve in rodent species that differ in size and lifespan. *Aging Cell*, 7(6),  
793 813-823. doi:10.1111/j.1474-9726.2008.00431.x
- 794 Senar, J., & Pascual, J. (1997). Keel and tarsus length may provide a good predictor of avian  
795 body size. *Ardea*, 85, 269-274.
- 796 Simons, M. J. (2015). Questioning causal involvement of telomeres in aging. *Ageing Res Rev*,  
797 24(Pt B), 191-196. doi:10.1016/j.arr.2015.08.002
- 798 Sinervo, B., Méndez-de-la-Cruz, F., Miles, D. B., Heulin, B., Bastiaans, E., Villagrán-Santa  
799 Cruz, M., Lara-Resendiz, R., Martínez-Méndez, N., Calderón-Espinosa, M. L., Meza-  
800 Lázaro, R. N., Gadsden, H., Avila, L. J., Morando, M., De la Riva, I. J., Sepulveda, P.  
801 V., Rocha, C. F. D., Ibarguengoytía, N., Puntriano, C. A., Massot, M., Lepetz, V.,  
802 Oksanen, T. A., Chapple, D. G., Bauer, A. M., Branch, W. R., Clobert, J., & Sites, J.  
803 W. (2010). Erosion of lizard diversity by climate change and altered thermal niches.  
804 *Science*, 328(5980), 894. doi:10.1126/science.1184695
- 805 Sridevi, V., Uma, K. D., Sivaramakrishnan, S., & Isola, N. R. (2002). Telomere length as  
806 related to chromosome length in the genus *Pennisetum*. *Cytologia*, 67(2), 185-190.
- 807 Sudyka, J., Arct, A., Drobniak, S. M., Gustafsson, L., & Cichoń, M. (2019). Birds with high  
808 lifetime reproductive success experience increased telomere loss. *Biology Letters*,  
809 15(1), 20180637. doi:10.1098/rsbl.2018.0637
- 810 Szulkin, M., & Sheldon, B. C. (2007). The environmental dependence of inbreeding  
811 depression in a wild bird population. *PLoS One*, 2(10), e1027.  
812 doi:10.1371/journal.pone.0001027
- 813 Saatoglu, D., Niskanen, A. K., Kuismin, M., Ranke, P. S., Hagen, I. J., Araya-Ajoy, Y. G.,  
814 Kvalnes, T., Pärn, H., Rønning, B., Ringsby, T. H., Sæther, B.-E., Husby, A.,  
815 Sillanpää, M. J., & Jensen, H. (2021). Dispersal in a house sparrow metapopulation:

- 816 An integrative case study of genetic assignment calibrated with ecological data and  
817 pedigree information. *Mol Ecol*, n/a(n/a). doi:<https://doi.org/10.1111/mec.16083>
- 818 Tricola, G. M., Simons, M. J. P., Atema, E., Boughton, R. K., Brown, J. L., Dearborn, D. C.,  
819 Divoky, G., Eimes, J. A., Huntington, C. E., Kitaysky, A. S., Juola, F. A., Lank, D.  
820 B., Litwa, H. P., Mulder, E. G. A., Nisbet, I. C. T., Okanoya, K., Safran, R. J.,  
821 Schoech, S. J., Schreiber, E. A., Thompson, P. M., Verhulst, S., Wheelwright, N. T.,  
822 Winkler, D. W., Young, R., Vleck, C. M., & Haussmann, M. F. (2018). The rate of  
823 telomere loss is related to maximum lifespan in birds. *Philosophical Transactions of*  
824 *the Royal Society B: Biological Sciences*, 373(1741), 20160445.  
825 doi:10.1098/rstb.2016.0445
- 826 Voillemot, M., Hine, K., Zahn, S., Criscuolo, F., Gustafsson, L., Doligez, B., & Bize, P.  
827 (2012). Effects of brood size manipulation and common origin on phenotype and  
828 telomere length in nestling collared flycatchers. *BMC Ecology*, 12(1), 17.  
829 doi:10.1186/1472-6785-12-17
- 830 von Zglinicki, T. (2002). Oxidative stress shortens telomeres. *Trends Biochem Sci*, 27(7),  
831 339-344.
- 832 Wang, J. (2014). Marker-based estimates of relatedness and inbreeding coefficients: an  
833 assessment of current methods. *Journal of Evolutionary Biology*, 27(3), 518-530.  
834 doi:<https://doi.org/10.1111/jeb.12315>
- 835 Weinstein, B. S., & Cizek, D. (2002). The reserve-capacity hypothesis: evolutionary origins  
836 and modern implications of the trade-off between tumor-suppression and tissue-  
837 repair. *Experimental gerontology*, 37(5), 615-627. doi:[https://doi.org/10.1016/S0531-](https://doi.org/10.1016/S0531-5565(02)00012-8)  
838 [5565\(02\)00012-8](https://doi.org/10.1016/S0531-5565(02)00012-8)
- 839 Wickham, H. (2016). *ggplot2: Elegant graphics for data analysis*: Springer-Verlag New  
840 York.
- 841 Wiener, P., & Wilkinson, S. (2011). Deciphering the genetic basis of animal domestication.  
842 *Proceedings of the Royal Society B: Biological Sciences*, 278(1722), 3161-3170.  
843 doi:10.1098/rspb.2011.1376
- 844 Wilbourn, R. V., Froy, H., McManus, M.-C., Cheynel, L., Gaillard, J.-M., Gilot-Fromont, E.,  
845 Regis, C., Rey, B., Pellerin, M., Lemaître, J.-F., & Nussey, D. H. (2017). Age-  
846 dependent associations between telomere length and environmental conditions in roe  
847 deer. *Biology letters*, 13(9), 20170434. doi:10.1098/rsbl.2017.0434
- 848 Wilbourn, R. V., Moatt, J. P., Froy, H., Walling, C. A., Nussey, D. H., & Boonekamp, J. J.  
849 (2018). The relationship between telomere length and mortality risk in non-model  
850 vertebrate systems: a meta-analysis. *Philos Trans R Soc Lond B Biol Sci*, 373(1741),  
851 20160447. doi:10.1098/rstb.2016.0447
- 852 Wood, E. M., Capilla-Lasheras, P., Cram, D. L., Walker, L. A., York, J. E., Lange, A.,  
853 Hamilton, P. B., Tyler, C. R., & Young, A. J. (2021). Social dominance and rainfall  
854 predict telomere dynamics in a cooperative arid-zone bird. *Mol Ecol*, n/a(n/a).  
855 doi:<https://doi.org/10.1111/mec.15868>
- 856 Wright, L. I., Tregenza, T., & Hosken, D. J. (2007). Inbreeding, inbreeding depression and  
857 extinction. *Conservation Genetics*, 9(4), 833. doi:10.1007/s10592-007-9405-0
- 858 Yang, J., Lee, S. H., Goddard, M. E., & Visscher, P. M. (2011). GCTA: A tool for genome-  
859 wide complex trait analysis. *The American Journal of Human Genetics*, 88(1), 76-82.  
860 doi:10.1016/j.ajhg.2010.11.011
- 861 Young, A. J. (2018). The role of telomeres in the mechanisms and evolution of life-history  
862 trade-offs and ageing. *Philos Trans R Soc Lond B Biol Sci*, 373(1741), 20160452.  
863 doi:10.1098/rstb.2016.0452
- 864

865 **TABLES AND FIGURES**

866 **Table 1:** Number of nestling house sparrows of each sex and in total with early-life telomere  
 867 length and inbreeding coefficient measurements within each population (Hestmannøy and  
 868 Træna) for each measure of inbreeding (microsatellite pedigree-based inbreeding coefficient  
 869 [ $F_{PED}$ ], genomic inbreeding coefficient [ $F_{GRM}$ ], and runs-of-homozygosity [ $F_{ROH}$ ]). Number  
 870 of individuals with at least two known full ancestral generations (gen.) are shown. Number of  
 871 individuals with  $F_{GRM}$  values above and below the mean  $F_{GRM}$ , which is used as a break point  
 872 to differentiate individuals that were more and less inbred than average, respectively, are also  
 873 shown.

| Island population:                   | Hestmannøy |         |      | Træna |         |      | Sum: |
|--------------------------------------|------------|---------|------|-------|---------|------|------|
|                                      | Males      | Females | Sum: | Males | Females | Sum: |      |
| $F_{PED} (\geq 1.5 \text{ gen.})$    | 511        | 546     | 1057 | 78    | 60      | 138  | 1195 |
| $F_{PED} (\geq 2 \text{ full gen.})$ | 148        | 165     | 313  | 4     | 3       | 7    | 320  |
| $F_{GRM}$                            | 140        | 135     | 275  | 49    | 47      | 96   | 371  |
| $F_{GRM} > 0.016$                    | 43         | 63      | 106  | 26    | 32      | 58   | 164  |
| $F_{GRM} < 0.016$                    | 97         | 72      | 169  | 23    | 15      | 38   | 207  |
| $F_{ROH}$                            | 140        | 135     | 275  | 49    | 47      | 96   | 371  |

874

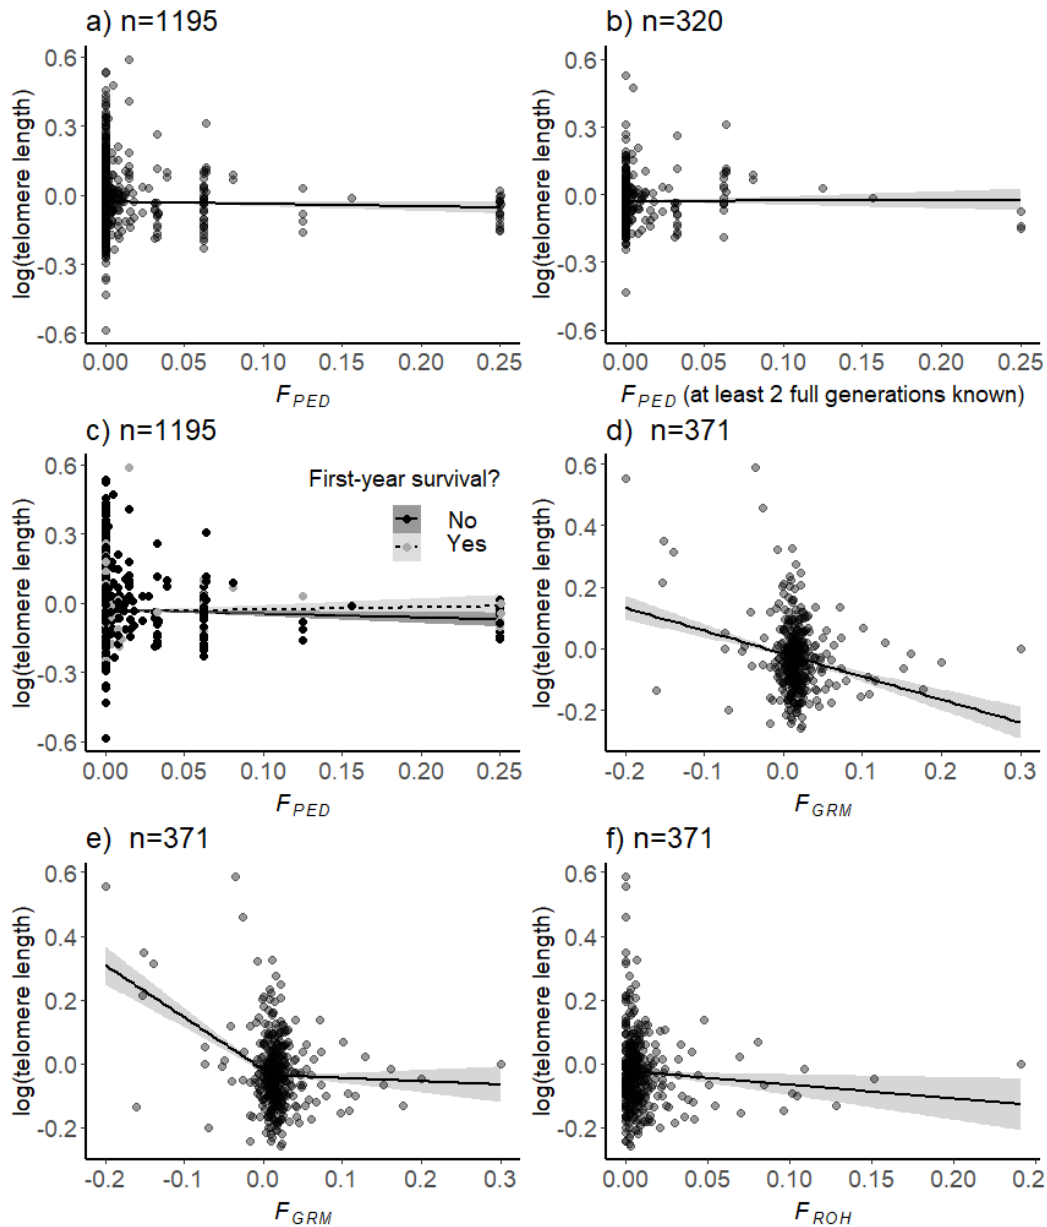

875

876 **Fig. 1:** Associations between early-life telomere length ( $\log_{10}$ -transformed) and various  
877 individual measures of inbreeding in wild house sparrows: a) microsatellite pedigree-based  
878 inbreeding coefficient ( $F_{PED}$ ), b)  $F_{PED}$  for individuals with at least two full ancestral  
879 generations known, c) testing for an interaction effect between  $F_{PED}$  and first-year survival  
880 (survivors:  $n=206$  in grey, dotted regression line; non-survivors:  $n=989$  in black, solid  
881 regression line), d) genomic inbreeding coefficient  $F_{GRM}$ , e) regression with a break point at  
882 the mean  $F_{GRM}$  (0.016), and f) runs-of-homozygosity  $F_{ROH}$ . Black lines show the predicted  
883 effect of the inbreeding coefficient on TL from LMMs described in the text and the grey area  
884 shows 95% confidence intervals. Note that the y-axis is not scaled equally across panels and  
885 that color of points are graduated for visibility.

886

887 **Table 2:** Estimates, standard errors (SE), lower and upper 95% confidence intervals (CI)  
 888 from the highest ranked model of  $F_{PED}$  predicting variation in early-life TL ( $n=1195$ , see  
 889 Table S2 and Fig. 1a). The model included random intercepts for brood identity (ID) and  
 890 year. Estimates with CIs not overlapping 0 are shown in italics.

891

|     | <b>Response variable: <math>\log_{10}(\text{TL})</math></b> | <b>Estimate</b> | <b>SE</b>    | <b>Lower CI</b> | <b>Upper CI</b> |
|-----|-------------------------------------------------------------|-----------------|--------------|-----------------|-----------------|
| 892 | intercept                                                   | -3.1E-4         | 0.037        | -0.072          | 0.071           |
| 893 | inbreeding coefficient ( $F_{PED}$ )                        | -0.169          | 0.101        | -0.366          | 0.028           |
|     | tarsus length                                               | -0.003          | 0.002        | -0.008          | 0.001           |
| 894 | sex [female]                                                | -0.006          | 0.006        | -0.017          | 0.005           |
|     | <i>island identity [Hestmannøy]</i>                         | <i>0.025</i>    | <i>0.012</i> | <i>0.001</i>    | <i>0.049</i>    |
| 895 | age                                                         | -0.003          | 0.002        | -0.007          | 0.001           |
| 896 | hatch day                                                   | -1.4E-4         | 1.5E-4       | -4.4E-4         | 1.7E-4          |
|     | $\sigma^2_{\text{brood ID}} (n=500)$                        | 0.002           |              | 0.001           | 0.003           |
| 897 | $\sigma^2_{\text{year}} (n=20)$                             | 0.003           |              | 0.001           | 0.006           |
| 898 | Marginal $R^2$ / Conditional $R^2$ : 0.014 / 0.393          |                 |              |                 |                 |

899

900 **Table 3:** Estimates, standard errors (SE), lower and upper 95% confidence intervals (CI)  
 901 from the highest ranked model of  $F_{GRM}$  predicting variation in early-life TL ( $n=371$ , see  
 902 Table S6 and Fig. 1d).

903

|     | <b>Response variable: <math>\log_{10}(\text{TL})</math></b> | <b>Estimate</b> | <b>SE</b>    | <b>Lower CI</b> | <b>Upper CI</b> |
|-----|-------------------------------------------------------------|-----------------|--------------|-----------------|-----------------|
| 904 | intercept                                                   | 0.069           | 0.038        | -0.004          | 0.145           |
| 905 | <i>inbreeding coefficient (<math>F_{GRM}</math>)</i>        | <i>-1.517</i>   | <i>0.293</i> | <i>-2.150</i>   | <i>-0.920</i>   |
|     | tarsus length                                               | -0.001          | 0.005        | -0.011          | 0.009           |
| 906 | sex [female]                                                | -0.016          | 0.011        | -0.039          | 0.006           |
|     | <i>island identity [Hestmannøy]</i>                         | <i>-0.036</i>   | <i>0.016</i> | <i>-0.068</i>   | <i>-0.004</i>   |
|     | age                                                         | -0.006          | 0.003        | -0.012          | 4.6E-4          |
| 907 | hatch day                                                   | -3.3E-4         | 2.8E-4       | -0.001          | 2.1E-4          |
|     | <i><math>F_{GRM}</math> * island [Hestmannøy]</i>           | <i>0.824</i>    | <i>0.339</i> | <i>0.142</i>    | <i>1.529</i>    |
| 908 | <i><math>F_{GRM}</math> * sex [female]</i>                  | <i>0.644</i>    | <i>0.314</i> | <i>0.034</i>    | <i>1.262</i>    |
|     | $\sigma^2_{\text{brood ID}} (n=273)$                        | 0.004           |              | 0.002           | 0.006           |
|     | $\sigma^2_{\text{year}} (n=17)$                             | 0.001           |              | 0.000           | 0.003           |
| 909 | Marginal $R^2$ / Conditional $R^2$ : 0.085 / 0.512          |                 |              |                 |                 |

910

911 **Table 4:** Estimates, standard errors (SE), lower and upper 95% confidence intervals (CI)  
 912 from the highest ranked model from Table S7 including a break point at  $F_{GRM}=0.016$  ( $n=371$ ,  
 913 see also Table S1). These effects of  $F_{GRM}$  are shown in Fig. 1e.

| <b>Response variable: <math>\log_{10}(TL)</math></b>            | <b>Estimate</b> | <b>SE</b> | <b>Lower CI</b> | <b>Upper CI</b> |
|-----------------------------------------------------------------|-----------------|-----------|-----------------|-----------------|
| intercept                                                       | 0.021           | 0.037     | -0.051          | 0.095           |
| <i>inbreeding coefficient (<math>F_{GRM}</math>) &lt; 0.016</i> | -2.177          | 0.372     | -3.051          | -1.379          |
| <i>inbreeding coefficient (<math>F_{GRM}</math>) &gt; 0.016</i> | 0.189           | 0.498     | -0.780          | 1.153           |
| tarsus length                                                   | -0.001          | 0.005     | -0.011          | 0.008           |
| sex [female]                                                    | -0.006          | 0.010     | -0.027          | 0.014           |
| island identity [Hestmannøy]                                    | -0.009          | 0.016     | -0.041          | 0.024           |
| age                                                             | -0.005          | 0.003     | -0.011          | 0.001           |
| hatch day                                                       | -3.7E-4         | 2.7E-4    | -0.001          | 1.5E-4          |
| $F_{GRM} < 0.016$ * island [Hestmannøy]                         | 1.562           | 0.465     | 0.610           | 2.576           |
| $F_{GRM} > 0.016$ * island [Hestmannøy]                         | -0.026          | 0.561     | -1.114          | 1.061           |
| $\sigma^2_{\text{brood ID}} (n=273)$                            | 0.003           |           | 0.001           | 0.005           |
| $\sigma^2_{\text{year}} (n=17)$                                 | 0.001           |           | 0.000           | 0.003           |
| Marginal $R^2$ / Conditional $R^2$ : 0.106 / 0.458              |                 |           |                 |                 |

914

915

916 **Table 5:** Estimates, standard errors (SE), lower and upper 95% confidence intervals (CI)  
 917 from the highest ranked model from of  $F_{ROH}$  predicting variation in early-life TL ( $n=371$ , see  
 918 Table S8 and Fig. 1f).

919

| <b>Response variable: <math>\log_{10}(TL)</math></b> | <b>Estimate</b> | <b>SE</b> | <b>Lower CI</b> | <b>Upper CI</b> |
|------------------------------------------------------|-----------------|-----------|-----------------|-----------------|
| intercept                                            | 0.051           | 0.040     | -0.027          | 0.130           |
| <i>inbreeding coefficient (<math>F_{ROH}</math>)</i> | -1.148          | 0.512     | -2.144          | -0.153          |
| tarsus length                                        | -0.001          | 0.005     | -0.011          | 0.010           |
| sex [female]                                         | -0.018          | 0.012     | -0.041          | 0.005           |
| island identity [Hestmannøy]                         | -0.020          | 0.016     | -0.052          | 0.012           |
| age                                                  | -0.005          | 0.003     | -0.012          | 0.001           |
| hatch day                                            | -2.9E-4         | 3.0E-4    | -0.001          | 2.9E-4          |
| $F_{ROH}$ * sex [female]                             | 0.915           | 0.610     | -0.270          | 2.102           |
| $\sigma^2_{\text{brood ID}} (n=273)$                 | 0.006           |           | 0.004           | 0.008           |
| $\sigma^2_{\text{year}} (n=17)$                      | 0.002           |           | 4.6E-4          | 0.004           |
| Marginal $R^2$ / Conditional $R^2$ : 0.029 / 0.579   |                 |           |                 |                 |
